# Supplementary material for: Extracellular Vesicles from SOD3-Transduced Stem Cells Exhibit Improved Immunomodulatory Abilities in the Murine Dermatitis Model
Source: MDPI journal article supplement (doi:10.3390/antiox9111165), 2020-11-23
Supplement: s1 [file s1]

## Supplementary Figures

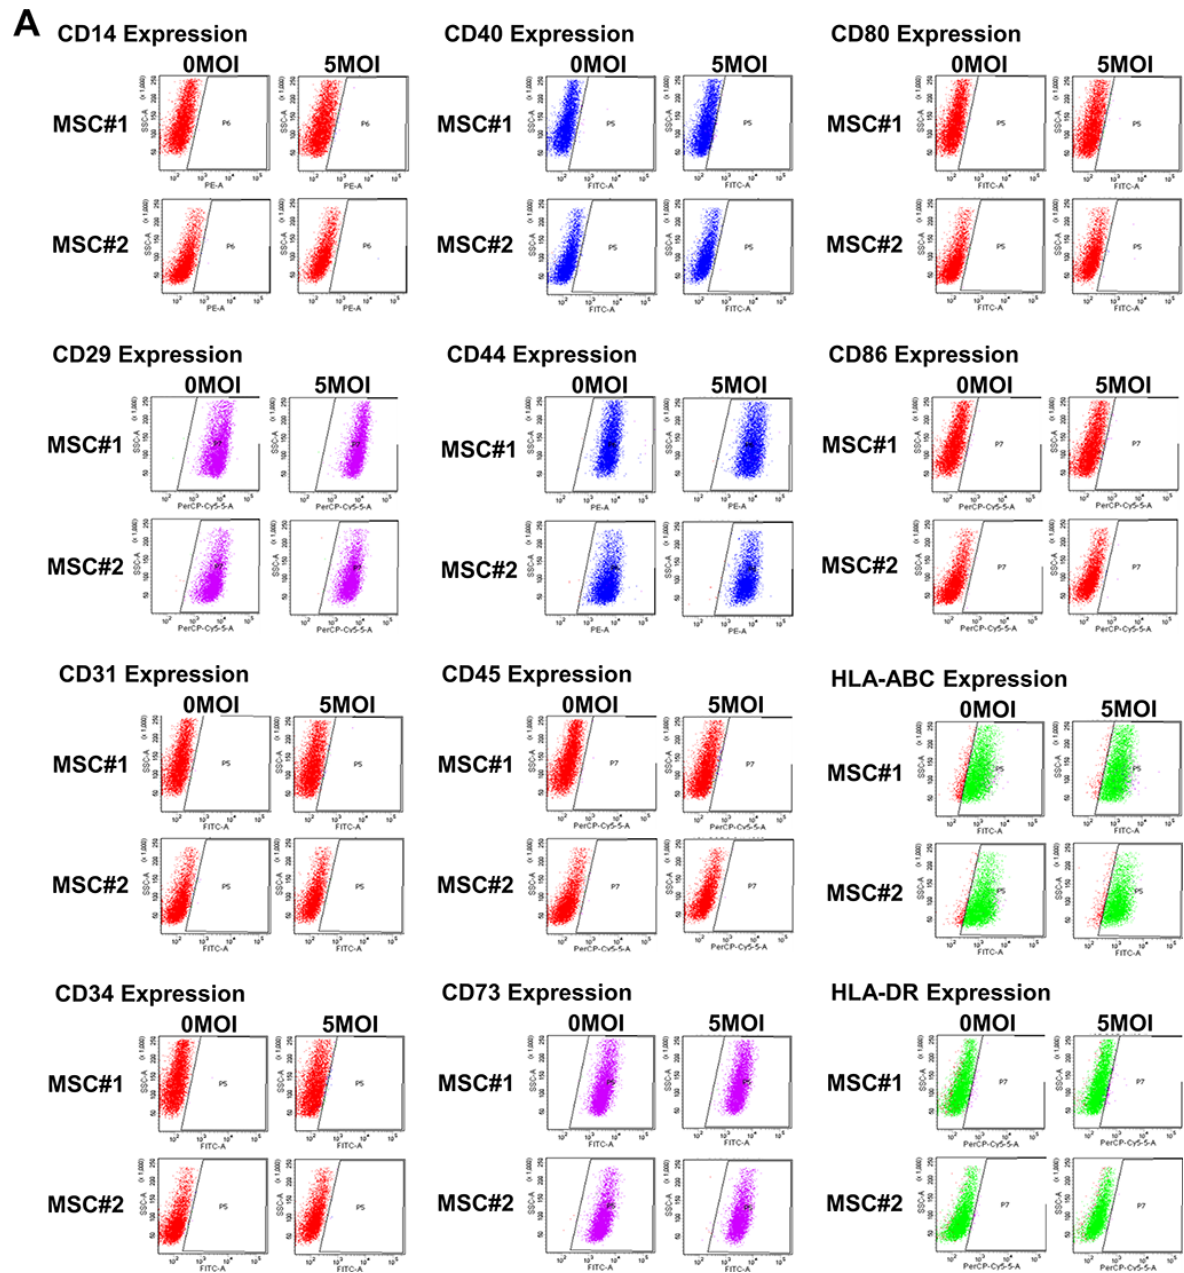

**Figure S1. The expression of cell surface markers for MSCs (A) Expression of MSC markers and immunogenicity-related surface antigens was analyzed by flow cytometry.**

**A**

|   | A            | B            | C      | D      | E      | F              | G              | H             | I          | J         | K          | L     |
|---|--------------|--------------|--------|--------|--------|----------------|----------------|---------------|------------|-----------|------------|-------|
| 1 | POS          | POS          | NEG    | NEG    | ALCAM  | Angiopoietin-1 | B7-H1          | bFGF          | DKK-1      | DKK-3     | Fas Ligand | IGF-I |
| 2 | POS          | POS          | NEG    | NEG    | ALCAM  | Angiopoietin-1 | B7-H1          | bFGF          | DKK-1      | DKK-3     | Fas Ligand | IGF-I |
| 3 | IL- $\alpha$ | IL-1 $\beta$ | IL-1RA | IL-8   | MMP-9  | SCF            | SDF-1 $\alpha$ | SDF-1 $\beta$ | Serpin A4  | Serpin F1 | TSP-1      | TSP-2 |
| 4 | IL- $\alpha$ | IL-1 $\beta$ | IL-1RA | IL-8   | MMP-9  | SCF            | SDF-1 $\alpha$ | SDF-1 $\beta$ | Serpin A4  | Serpin F1 | TSP-1      | TSP-2 |
| 5 | TIMP-2       | TRAIL        | VEGF-A | VEGF-C | VEGF-D | TGF- $\beta$ 1 | Galectin-1     | Galectin-3    | Galectin-9 | HGF       | IL-6       | IL-10 |
| 6 | TIMP-2       | TRAIL        | VEGF-A | VEGF-C | VEGF-D | TGF- $\beta$ 1 | Galectin-1     | Galectin-3    | Galectin-9 | HGF       | IL-6       | IL-10 |
| 7 | M-CSF        | LIF          | IL-18  | IL-33  |        |                |                |               |            |           |            | POS   |
| 8 | M-CSF        | LIF          | IL-18  | IL-33  |        |                |                |               |            |           |            | POS   |

**B**

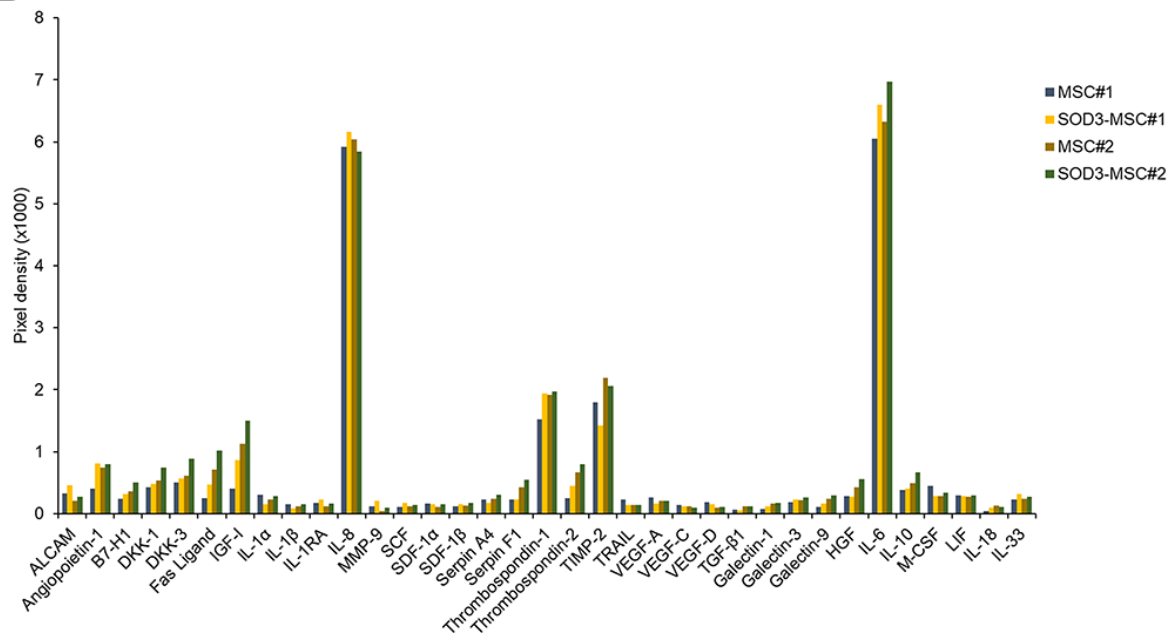

**Figure S2. The secretion of soluble factors involved in the immunomodulation and migration in conditioned medium of MSCs (A) The table showing the positions of cytokines. (B) Quantification of the pixels for each identified cytokine in non-transduced and transduced MSC#1, MSC#2 CM. Data are normalized after background subtraction.**

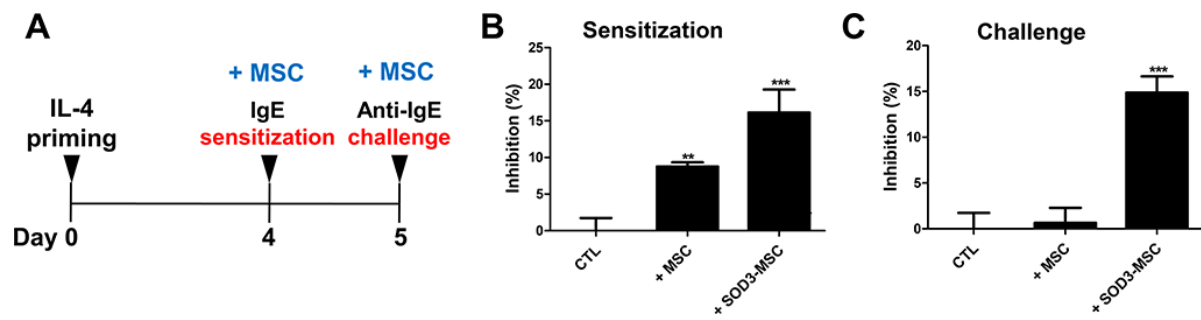

**Figure S3. Mast cell degranulation protocol and effect of MSCs on degranulation.** (A) The timeline showing the process of degranulation induction in LAD-2 cells. (B, C) Inhibitory effect of MSCs on LAD2 degranulation was determined by measuring  $\beta$ -hex. Results are shown as mean  $\pm$  SD. \* $P < .05$ , \*\* $P < .01$ , \*\*\* $P < .001$ .

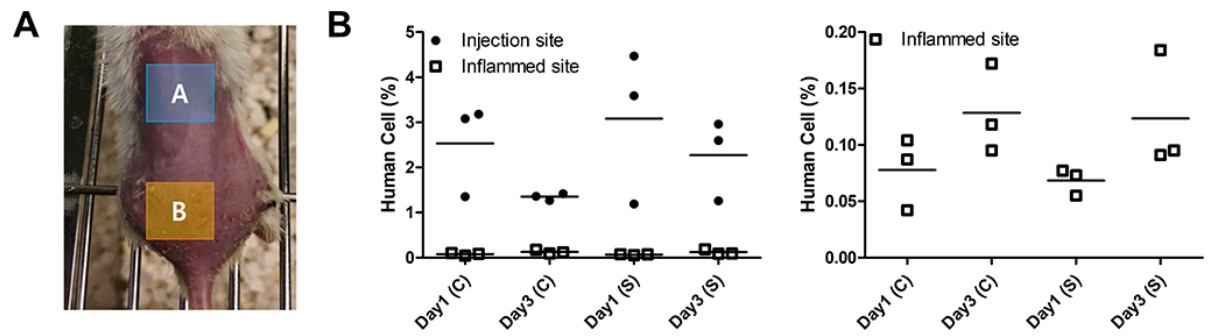

**Figure S4. Migratory ability of SOD3-MSCs *in vivo*.** (A) A photo showing the injection site 'A' and **inflamed** site 'B'. (B) Mice were injected with MSCs or SOD3-MSCs. The % amount of MSCs and SOD3-MSCs in skin samples were measured by quantifying human **ALU** gene. The amount of MSCs and SOD3-MSCs in the injection site and **inflamed** site was compared at day 1 and 3.

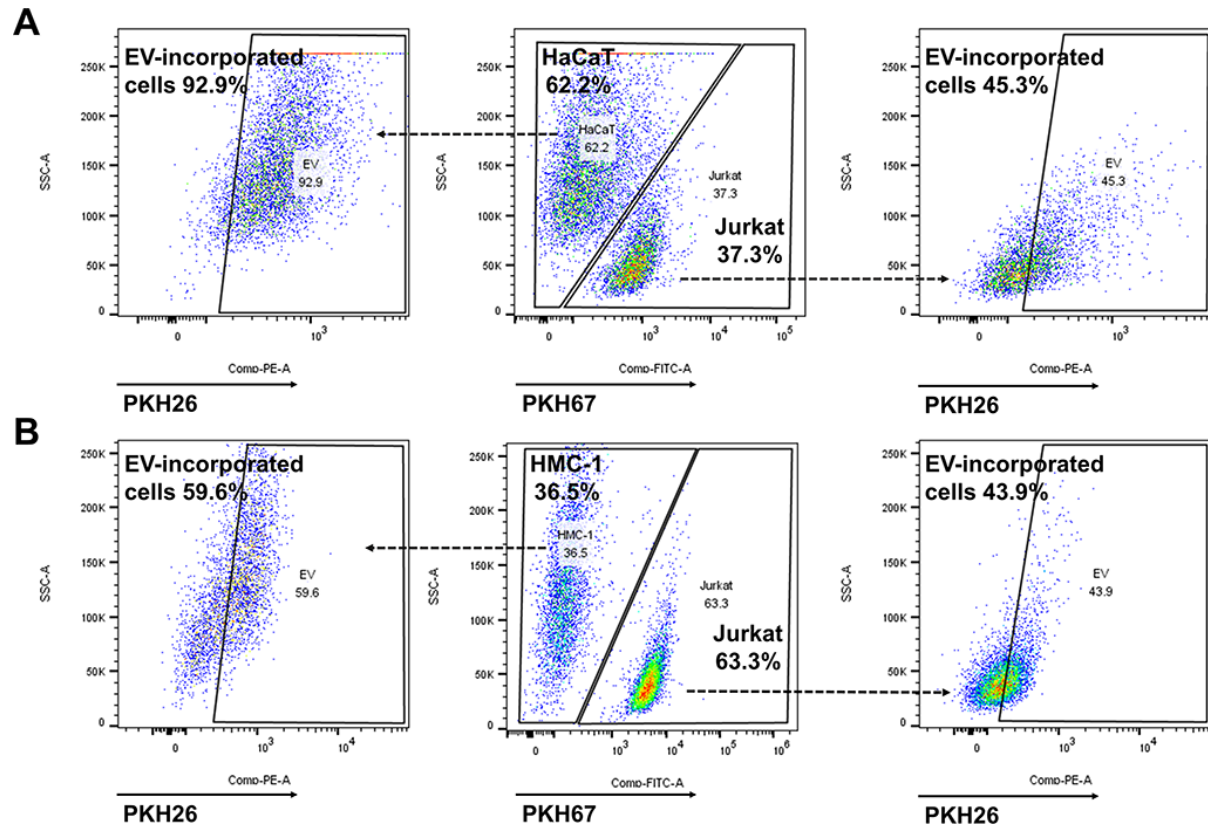

**Figure S5. Evaluation of EV uptake efficiency into mast cells, keratinocytes and Jurkat cells.**  
**(A)** EV uptake efficiency into HaCaT cells and Jurkat cells were analyzed by flow cytometry. Unlabeled HaCaT cells and PKH67-labeled Jurkat cells were treated with PKH26 stained EVs.  
**(B)** EV uptake efficiency into HMC-1 cells and Jurkat cells were analyzed by flow cytometry. Unlabeled HMC-1 cells and PKH67-labeled Jurkat cells were treated with PKH26 stained EVs.

## **Supplementary Materials and Methods**

### **Internalization of EVs – Related to Figure S5**

hUCB-MSCs derived EVs were labeled with PKH26 red fluorescent cell linker kit (Sigma, Saint Louis, MO, USA) according to the manufacturer's instruction. Labeled exosomes were treated into co-cultured cells unlabeled HaCaT and PKH67 (Sigma)-labeled T cell or unlabeled HMC-1 and PKH67-labeled T cell for 24 h. Internalization of EVs were detected by BD FACS CantoII flow cytometer (BD), and data were analyzed with FlowJo software (BD).
